# Supplementary material for: Dual targeting of mitochondrial function and mTOR pathway as a therapeutic strategy for diffuse intrinsic pontine glioma
Source: PubMed Central journal article supplement (PMC5800923; doi:10.18632/oncotarget.24045), 2018-01-08
Supplement: oncotarget-09-7541-s001.pdf [file oncotarget-09-7541-s001.pdf]

## Dual targeting of mitochondrial function and mTOR pathway as a therapeutic strategy for diffuse intrinsic pontine glioma

### SUPPLEMENTARY MATERIALS

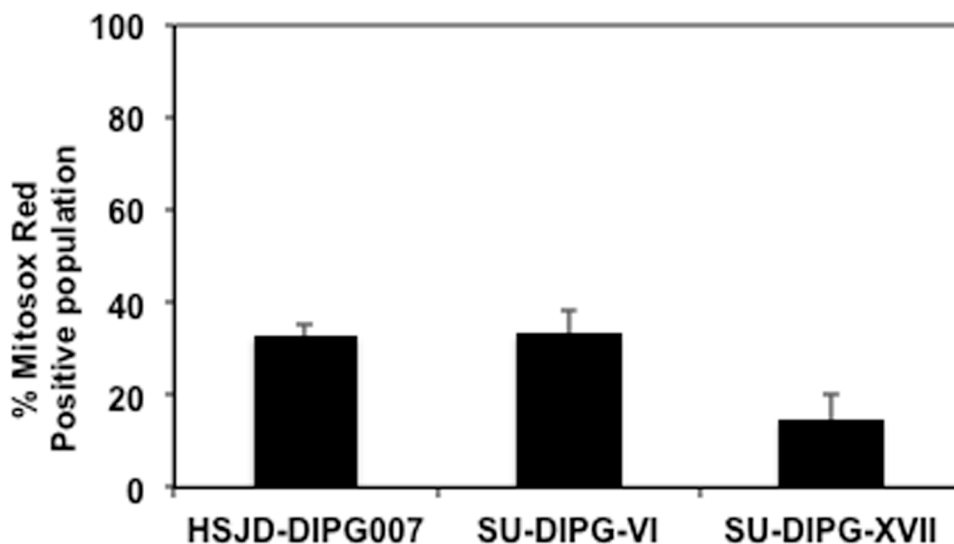

**Supplementary Figure 1: Flow cytometric analysis of neurosphere-forming DIPG cells for production of mitochondrial ROS.** DIPG cells were stained with MitosoxRed and analysed with FACS Canto B. Data represent average and SD of 3 determinations.

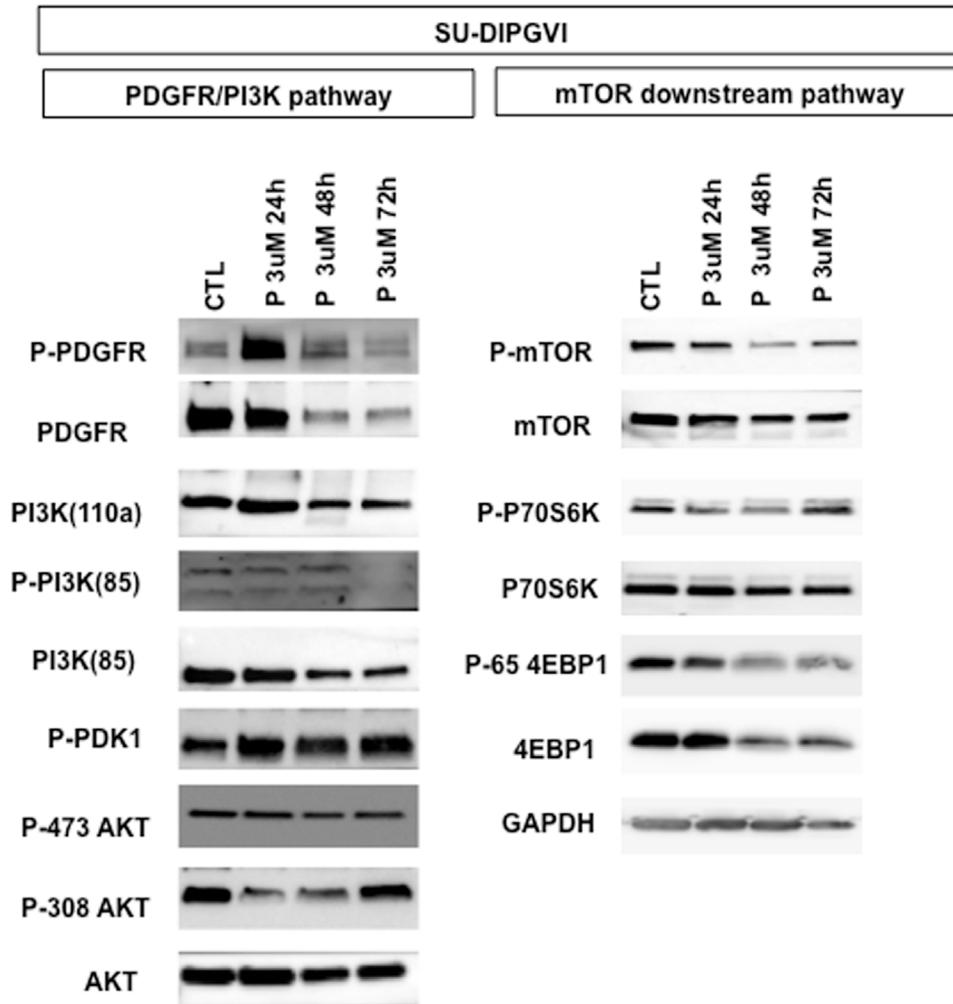

**Supplementary Figure 2: PENAO affects PDGFR/PI3K/mTOR pathway in SU-DIPG-VI cells.** Representative western blot images of key players involved in PDGFR $\alpha$ /PI3K/mTOR pathway in SU-DIPG-VI neurospheres treated with PENAO as a function of time. DIPG cells were treated with 3  $\mu$ M of PENAO for 24 h, 48, 72 h and subsequently lysed pellets were examined by western blotting.

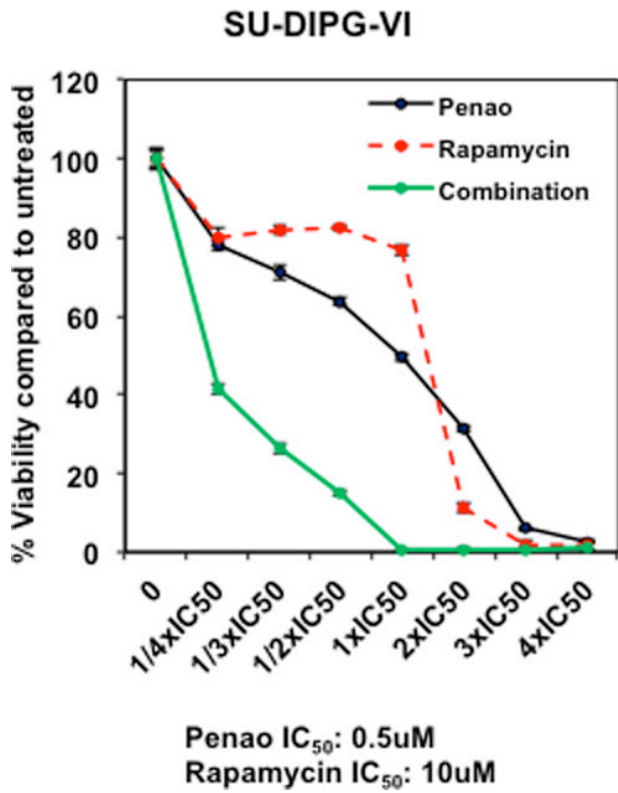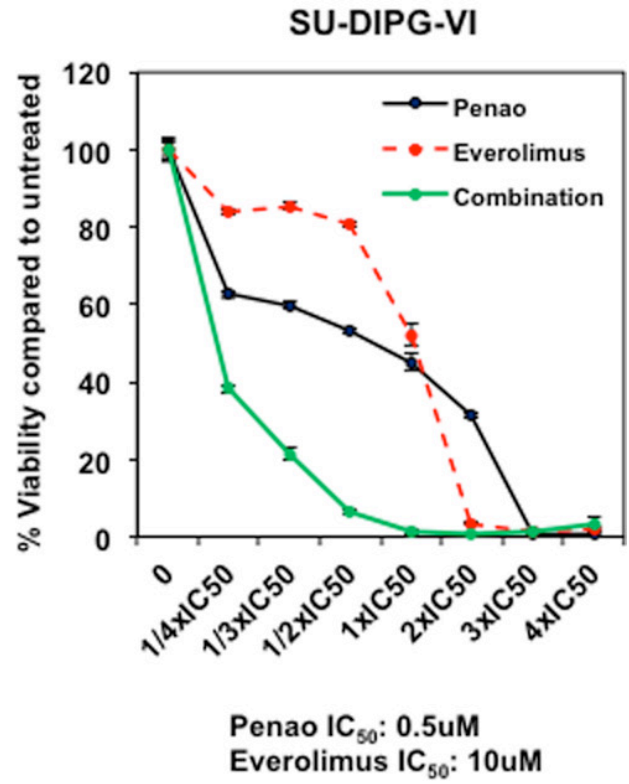

**Supplementary Figure 3: Cytotoxic efficacy of PENA0 can be enhanced with Rapalogue drugs.** Cytotoxic efficacy of PENA0 combined with Rapamycin and Everolimus tested at IC<sub>50</sub> fractions in neurosphere-forming SU-DIPG-VI cells. Viability was assessed by resazurin assay and presented as percentage viability compared to untreated cells. Experiment was replicated 2 times each time  $N = 10$ .

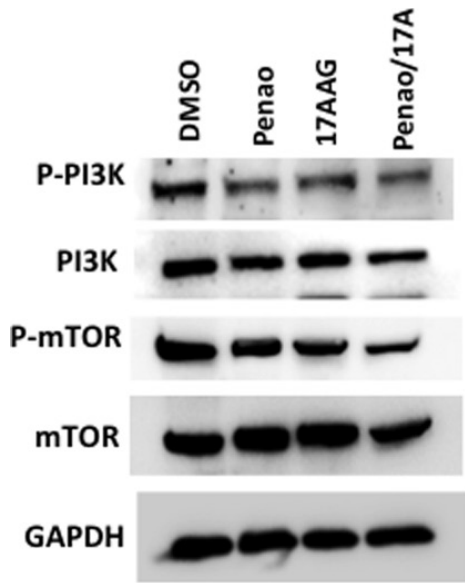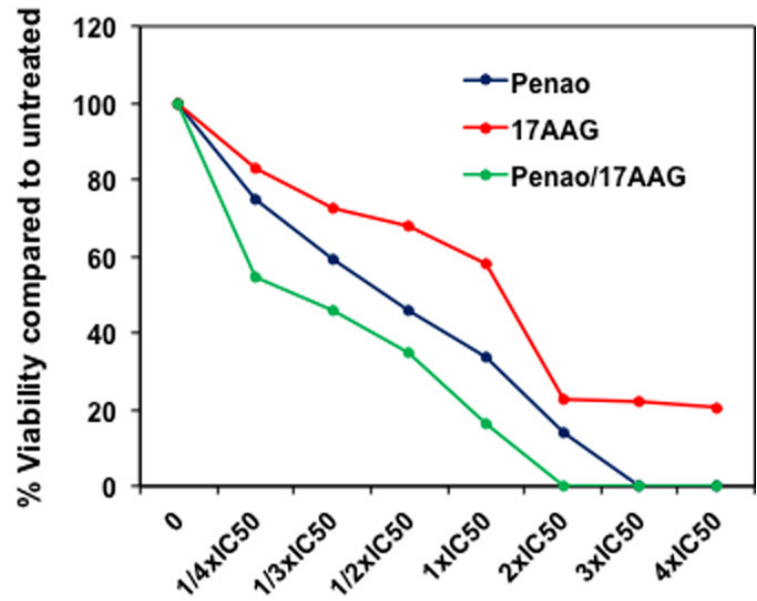

Penao IC<sub>50</sub>: 3uM  
 17AAG IC<sub>50</sub>: 80nM

**Supplementary Figure 4: Cytotoxic efficacy of PENAO can be enhanced with HSP90 inhibitor 17AAG.** Cytotoxic efficacy of PENAO combined with 17AAG tested at IC<sub>50</sub> fractions in neurosphere-forming HSJD-DIPG007 cells. Viability was assessed by resazurin assay and presented as percentage viability compared to untreated cells. Experiment was replicated 2 times each time  $N = 10$ . Western blot analysis of PI3K and mTOR upon treatment with PENAO/17AAG combination.
